# Supplementary material for: Chemotaxonomic discrimination of lichen species using an infrared chalcogenide fibre optic sensor: a useful tool for on-field biosourcing
Source: Royal Society of Chemistry journal article supplement (doi:10.1039/c6ra17140k), 2016-01-01
Supplement: c6ra17140k1.pdf [file c6ra17140k1.pdf]

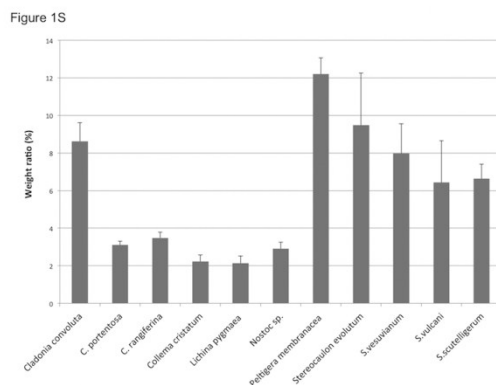

**Figure 1S:** Extraction yields for the lichen samples. 250 mg of ground lichen species were extracted with 6 mL of a mixture chloroform/methanol (2/1) during 2 hours at room temperature under stirring. This operation was repeated three times and filtrates were combined to give the organic extracts which were then evaporated to be weighed and stored under nitrogen. The extraction yield represents the ratio between the weight of the extract and the weight of the lichen powder.

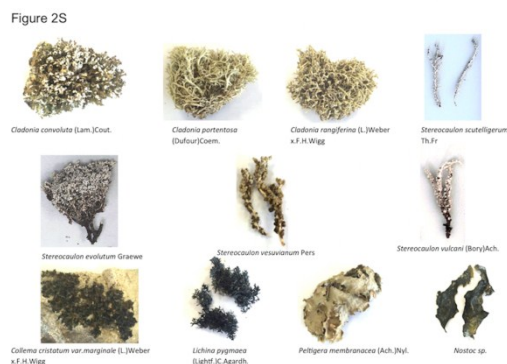

**Figure 2S:** Morphology of the eleven species included in the study

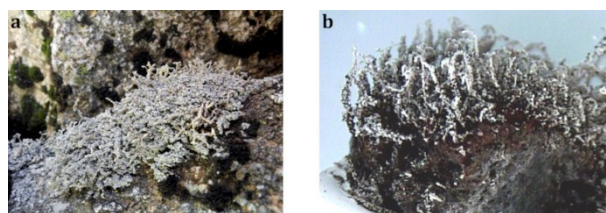

**Figure 3S:** Morphology of *Stereocaulon vesuvianum* (a) and *Stereocaulon vulcani* (b)

|                     |                                  | <i>Collema<br/>cristatum</i><br>(n=7) | <i>Lichina<br/>pygmaea</i><br>(n=8) | <i>Nostoc</i><br>(n=8) | <i>Peltigera<br/>membranacea</i><br>(n=7) | <i>S.<br/>Evolutum</i><br>(n=7) | <i>S.<br/>Vesuvianum</i><br>(n=8) | <i>S.<br/>Vulcani</i><br>(n=8) | <i>S.<br/>Scutelligerum</i><br>(n=6) | <i>Cladonia<br/>Convoluta</i><br>(n=8) | <i>Cladonia<br/>portentosa</i><br>(n=6) | <i>Cladonia<br/>rangiferina</i><br>(n=8) |
|---------------------|----------------------------------|---------------------------------------|-------------------------------------|------------------------|-------------------------------------------|---------------------------------|-----------------------------------|--------------------------------|--------------------------------------|----------------------------------------|-----------------------------------------|------------------------------------------|
| Model<br>prediction | <i>Collema<br/>cristatum</i>     | <b>7</b>                              | 0                                   | 0                      | 0                                         | 0                               | 0                                 | 0                              | 0                                    | 0                                      | 0                                       | 0                                        |
|                     | <i>Lichina<br/>pygmaea</i>       | 0                                     | <b>8</b>                            | 0                      | 0                                         | 0                               | 0                                 | 0                              | 0                                    | 0                                      | 0                                       | 0                                        |
|                     | <i>Nostoc</i>                    | 0                                     | 0                                   | <b>8</b>               | 0                                         | 0                               | 0                                 | 0                              | 0                                    | 0                                      | 0                                       | 0                                        |
|                     | <i>Peltigera<br/>membranacea</i> | 0                                     | 0                                   | 0                      | <b>7</b>                                  | 0                               | 0                                 | 0                              | 0                                    | 0                                      | 0                                       | 0                                        |
|                     | <i>S.evolutum</i>                | 0                                     | 0                                   | 0                      | 0                                         | <b>7</b>                        | 0                                 | 0                              | 0                                    | 0                                      | 0                                       | 0                                        |
|                     | <i>S.vesuvianu<br/>m</i>         | 0                                     | 0                                   | 0                      | 0                                         | 0                               | <b>8</b>                          | 0                              | 0                                    | 0                                      | 0                                       | 0                                        |
|                     | <i>S.vulcani</i>                 | 0                                     | 0                                   | 0                      | 0                                         | 0                               | 0                                 | <b>8</b>                       | 0                                    | 0                                      | 0                                       | 0                                        |
|                     | <i>S.scutelligeru<br/>m</i>      | 0                                     | 0                                   | 0                      | 0                                         | 0                               | 0                                 | 0                              | <b>6</b>                             | 0                                      | 0                                       | 0                                        |
|                     | <i>Cladonia<br/>Convoluta</i>    | 0                                     | 0                                   | 0                      | 0                                         | 0                               | 0                                 | 0                              | 0                                    | <b>8</b>                               | 0                                       | 0                                        |
|                     | <i>Cladonia<br/>portentosa</i>   | 0                                     | 0                                   | 0                      | 0                                         | 0                               | 0                                 | 0                              | 0                                    | 0                                      | <b>6</b>                                | 0                                        |
|                     | <i>Cladonia<br/>rangiferina</i>  | 0                                     | 0                                   | 0                      | 0                                         | 0                               | 0                                 | 0                              | 0                                    | 0                                      | 0                                       | <b>8</b>                                 |

Table 1S : PCA-LDA calibration result for the lichens extracts classification in the 1800-950cm<sup>-1</sup> domain

|                  |                              | <i>Collema cristatum</i><br>(n=2) | <i>Lichina pygmaea</i><br>(n=2) | <i>Nostoc</i><br>(n=2) | <i>Peltigera membranacea</i><br>(n=2) | <i>S. Evolutum</i><br>(n=2) | <i>S. Vesuvianum</i><br>(n=2) | <i>S. Vulcani</i><br>(n=2) | <i>S. Scutelligerum</i><br>(n=2) | <i>Cladonia Convoluta</i><br>(n=2) | <i>Cladonia portentosa</i><br>(n=2) | <i>Cladonia rangiferina</i><br>(n=2) |
|------------------|------------------------------|-----------------------------------|---------------------------------|------------------------|---------------------------------------|-----------------------------|-------------------------------|----------------------------|----------------------------------|------------------------------------|-------------------------------------|--------------------------------------|
| Model prediction | <i>Collema cristatum</i>     | 0                                 | 0                               | 0                      | 0                                     | 0                           | 0                             | 0                          | 0                                | 0                                  | 0                                   | 0                                    |
|                  | <i>Lichina pygmaea</i>       | 0                                 | 2                               | 0                      | 0                                     | 0                           | 0                             | 0                          | 0                                | 0                                  | 0                                   | 0                                    |
|                  | <i>Nostoc</i>                | 2                                 | 0                               | 2                      | 0                                     | 0                           | 0                             | 0                          | 0                                | 0                                  | 0                                   | 0                                    |
|                  | <i>Peltigera membranacea</i> | 0                                 | 0                               | 0                      | 2                                     | 0                           | 0                             | 0                          | 0                                | 0                                  | 0                                   | 0                                    |
|                  | <i>S. evolutum</i>           | 0                                 | 0                               | 0                      | 0                                     | 2                           | 0                             | 0                          | 0                                | 0                                  | 0                                   | 0                                    |
|                  | <i>S. vesuvianum</i>         | 0                                 | 0                               | 0                      | 0                                     | 0                           | 2                             | 0                          | 0                                | 0                                  | 0                                   | 0                                    |
|                  | <i>S. vulcani</i>            | 0                                 | 0                               | 0                      | 0                                     | 0                           | 0                             | 2                          | 0                                | 0                                  | 0                                   | 0                                    |
|                  | <i>S. scutelligerum</i>      | 0                                 | 0                               | 0                      | 0                                     | 0                           | 0                             | 0                          | 2                                | 0                                  | 0                                   | 0                                    |
|                  | <i>Cladonia Convoluta</i>    | 0                                 | 0                               | 0                      | 0                                     | 0                           | 0                             | 0                          | 0                                | 2                                  | 0                                   | 0                                    |
|                  | <i>Cladonia portentosa</i>   | 0                                 | 0                               | 0                      | 0                                     | 0                           | 0                             | 0                          | 0                                | 0                                  | 1                                   | 0                                    |
|                  | <i>Cladonia rangiferina</i>  | 0                                 | 0                               | 0                      | 0                                     | 0                           | 0                             | 0                          | 0                                | 0                                  | 0                                   | 2                                    |

Table 2S : PCA-LDA validation result for the lichens extracts classification in the 1800-950cm<sup>-1</sup> domain
